# Supplementary material for: eMatchSite: Sequence Order-Independent Structure Alignments of Ligand Binding Pockets in Protein Models
Source: PubMed Central journal article supplement (PMC4168975; doi:10.1371/journal.pcbi.1003829), 2014-09-18
Supplement: pcbi.1003829.s006.pdf [file pcbi.1003829.s006.pdf]

| Dataset                | Number of targets | Global structure    |            |            |            | Ligand binding pocket |                           |                  |
|------------------------|-------------------|---------------------|------------|------------|------------|-----------------------|---------------------------|------------------|
|                        |                   | $C\alpha$ -RMSD [Å] | TM-score   | MaxSub     | GDT-score  | RMSD <sup>e</sup> [Å] | Distance <sup>f</sup> [Å] | MCC <sup>g</sup> |
| <b>SOIPPA</b>          |                   |                     |            |            |            |                       |                           |                  |
| Crystal <sup>a</sup>   | 211               | -                   | -          | -          | -          | -                     | 1.7 ±1.4                  | 0.70 ±0.10       |
| HQ models <sup>b</sup> | 202               | 4.4 ±2.4            | 0.83 ±0.07 | 0.65 ±0.12 | 0.69 ±0.10 | 2.0 ±1.4              | 1.8 ±1.4                  | 0.67 ±0.10       |
| MQ models <sup>c</sup> | 174               | 13.2 ±4.6           | 0.54 ±0.10 | 0.34 ±0.10 | 0.39 ±0.09 | 5.7 ±3.5              | 1.9 ±1.3                  | 0.62 ±0.10       |
| 2Å RMSD <sup>d</sup>   | 205               | 2.0 ±0.1            | 0.91 ±0.03 | 0.78 ±0.02 | 0.78 ±0.03 | 1.3 ±0.5              | 1.8 ±1.2                  | 0.69 ±0.10       |
| 4Å RMSD <sup>d</sup>   | 199               | 4.0 ±0.1            | 0.78 ±0.05 | 0.55 ±0.06 | 0.63 ±0.04 | 2.4 ±1.0              | 2.1 ±1.3                  | 0.64 ±0.10       |
| 6Å RMSD <sup>d</sup>   | 174               | 6.0 ±0.1            | 0.68 ±0.06 | 0.46 ±0.07 | 0.54 ±0.05 | 3.2 ±1.5              | 2.5 ±1.5                  | 0.62 ±0.10       |
| <b>Kahraman</b>        |                   |                     |            |            |            |                       |                           |                  |
| Crystal <sup>a</sup>   | 53                | -                   | -          | -          | -          | -                     | 2.0 ±1.3                  | 0.65 ±0.11       |
| HQ models <sup>b</sup> | 53                | 4.5 ±2.6            | 0.84 ±0.08 | 0.66 ±0.14 | 0.70 ±0.12 | 1.8 ±1.3              | 2.2 ±1.5                  | 0.63 ±0.11       |
| MQ models <sup>c</sup> | 40                | 13.5 ±6.2           | 0.59 ±0.10 | 0.39 ±0.11 | 0.43 ±0.10 | 5.4 ±3.5              | 2.2 ±1.4                  | 0.59 ±0.10       |
| <b>Homogeneous</b>     |                   |                     |            |            |            |                       |                           |                  |
| Crystal <sup>a</sup>   | 51                | -                   | -          | -          | -          | -                     | 3.2 ±1.8                  | 0.63 ±0.14       |
| HQ models <sup>b</sup> | 47                | 5.1 ±3.3            | 0.82 ±0.08 | 0.65 ±0.12 | 0.68 ±0.10 | 2.2 ±2.0              | 3.2 ±2.0                  | 0.62 ±0.13       |
| MQ models <sup>c</sup> | 29                | 12.3 ±4.3           | 0.56 ±0.10 | 0.36 ±0.10 | 0.42 ±0.10 | 4.3 ±3.6              | 2.9 ±1.8                  | 0.59 ±0.11       |
| <b>Steroid</b>         |                   |                     |            |            |            |                       |                           |                  |
| Crystal <sup>a</sup>   | 1780              | -                   | -          | -          | -          | -                     | 2.3 ±1.5                  | 0.67 ±0.13       |
| HQ models <sup>b</sup> | 1660              | 4.4 ±2.4            | 0.84 ±0.06 | 0.69 ±0.11 | 0.71 ±0.09 | 2.0 ±1.8              | 2.3 ±1.5                  | 0.65 ±0.13       |
| MQ models <sup>c</sup> | 1153              | 12.7 ±4.4           | 0.54 ±0.10 | 0.35 ±0.10 | 0.40 ±0.10 | 5.5 ±3.5              | 2.5 ±1.5                  | 0.61 ±0.12       |

<sup>a</sup> Crystal structures. <sup>b</sup> High-quality protein models. <sup>c</sup> Moderate-quality protein models. <sup>d</sup> Structures artificially distorted to a desired  $C\alpha$ -RMSD. <sup>e</sup> Heavy-atom RMSD calculated over binding residues. <sup>f</sup> Distance between predicted pocket center and the geometric center of bound ligand. <sup>g</sup> Matthew's correlation coefficient for predicted binding residues.
