# Supplementary material for: eMatchSite: Sequence Order-Independent Structure Alignments of Ligand Binding Pockets in Protein Models
Source: PubMed Central journal article supplement (PMC4168975; doi:10.1371/journal.pcbi.1003829), 2014-09-18
Supplement: pcbi.1003829.s007.pdf [file pcbi.1003829.s007.pdf]

| Structure dataset       | Binding ligand          |                         |                         |                         |                         |                         |                         |                         |                         |                         |                         |                         |
|-------------------------|-------------------------|-------------------------|-------------------------|-------------------------|-------------------------|-------------------------|-------------------------|-------------------------|-------------------------|-------------------------|-------------------------|-------------------------|
|                         | <i>ADP</i>              |                         | <i>ATP</i>              |                         | <i>FAD</i>              |                         | <i>NAD</i>              |                         | <i>SAH</i>              |                         | <i>SAM</i>              |                         |
|                         | <i>PCC</i> <sup>a</sup> | <i>MSE</i> <sup>b</sup> | <i>PCC</i> <sup>a</sup> | <i>MSE</i> <sup>b</sup> | <i>PCC</i> <sup>a</sup> | <i>MSE</i> <sup>b</sup> | <i>PCC</i> <sup>a</sup> | <i>MSE</i> <sup>b</sup> | <i>PCC</i> <sup>a</sup> | <i>MSE</i> <sup>b</sup> | <i>PCC</i> <sup>a</sup> | <i>MSE</i> <sup>b</sup> |
| Crystal structures      | 0.79                    | 6.4                     | 0.73                    | 8.1                     | 0.96                    | 2.4                     | 0.89                    | 4.6                     | 0.95                    | 1.6                     | 0.76                    | 7.2                     |
| High-quality models     | 0.75                    | 7.3                     | 0.72                    | 8.6                     | 0.92                    | 4.6                     | 0.86                    | 6.1                     | 0.94                    | 1.9                     | 0.88                    | 3.6                     |
| Moderate-quality models | 0.75                    | 7.9                     | 0.68                    | 10.1                    | 0.88                    | 7.2                     | 0.86                    | 6.3                     | 0.86                    | 4.1                     | 0.83                    | 4.9                     |
| Distorted to 2Å RMSD    | 0.75                    | 7.6                     | 0.68                    | 9.6                     | 0.93                    | 4.3                     | 0.88                    | 5.2                     | 0.94                    | 2.0                     | 0.86                    | 4.4                     |
| Distorted to 4Å RMSD    | 0.69                    | 8.7                     | 0.68                    | 9.7                     | 0.88                    | 6.7                     | 0.84                    | 6.9                     | 0.86                    | 4.4                     | 0.83                    | 4.9                     |
| Distorted to 6Å RMSD    | 0.60                    | 10.9                    | 0.68                    | 10.0                    | 0.83                    | 8.5                     | 0.81                    | 7.3                     | 0.85                    | 4.4                     | 0.76                    | 7.5                     |

<sup>a</sup> Pearson correlation coefficient. <sup>b</sup> Mean squared error in Å.
