# Supplementary material for: eMatchSite: Sequence Order-Independent Structure Alignments of Ligand Binding Pockets in Protein Models
Source: PubMed Central journal article supplement (PMC4168975; doi:10.1371/journal.pcbi.1003829), 2014-09-18
Supplement: pcbi.1003829.s008.pdf [file pcbi.1003829.s008.pdf]

| Dataset                | Global similarity |           | Binding site matching |             |            |        |
|------------------------|-------------------|-----------|-----------------------|-------------|------------|--------|
|                        | Sequence          | Structure | eMatchSite            | PocketMatch | SiteEngine | sup-CK |
| <b>SOIPPA</b>          |                   |           |                       |             |            |        |
| Crystal <sup>a</sup>   | 0.553             | 0.657     | 0.941                 | 0.603       | 0.933      | -      |
| HQ models <sup>b</sup> | 0.553             | 0.655     | 0.953                 | 0.615       | 0.893      | -      |
| MQ models <sup>c</sup> | 0.564             | 0.671     | 0.987                 | 0.627       | 0.856      | -      |
| 2Å RMSD <sup>d</sup>   | 0.553             | 0.653     | 0.948                 | 0.616       | 0.911      | -      |
| 4Å RMSD <sup>d</sup>   | 0.553             | 0.659     | 0.954                 | 0.622       | 0.880      | -      |
| 6Å RMSD <sup>d</sup>   | 0.556             | 0.660     | 0.948                 | 0.610       | 0.889      | -      |
| <b>Kahraman</b>        |                   |           |                       |             |            |        |
| Crystal <sup>a</sup>   | 0.528             | 0.514     | 0.693                 | 0.523       | 0.660      | 0.657  |
| HQ models <sup>b</sup> | 0.528             | 0.542     | 0.702                 | 0.542       | 0.605      | 0.578  |
| MQ models <sup>c</sup> | 0.528             | 0.505     | 0.675                 | 0.536       | 0.594      | 0.569  |
| <b>Homogeneous</b>     |                   |           |                       |             |            |        |
| Crystal <sup>a</sup>   | 0.603             | 0.835     | 0.924                 | 0.736       | 0.760      | 0.812  |
| HQ models <sup>b</sup> | 0.603             | 0.810     | 0.910                 | 0.700       | 0.605      | 0.751  |
| MQ models <sup>c</sup> | 0.603             | 0.808     | 0.957                 | 0.707       | 0.571      | 0.656  |
| <b>Steroid</b>         |                   |           |                       |             |            |        |
| Crystal <sup>a</sup>   | 0.434             | 0.621     | 0.663                 | 0.531       | 0.550      | -      |
| HQ models <sup>b</sup> | 0.431             | 0.549     | 0.667                 | 0.520       | 0.598      | -      |
| MQ models <sup>c</sup> | 0.440             | 0.529     | 0.678                 | 0.476       | 0.413      | -      |

<sup>a</sup> Crystal structures. <sup>b</sup> High-quality protein models. <sup>c</sup> Moderate-quality protein models. <sup>d</sup> Structures artificially distorted to a desired C $\alpha$ -RMSD.
