# Supplementary material for: eMatchSite: Sequence Order-Independent Structure Alignments of Ligand Binding Pockets in Protein Models
Source: PubMed Central journal article supplement (PMC4168975; doi:10.1371/journal.pcbi.1003829), 2014-09-18
Supplement: pcbi.1003829.s009.pdf [file pcbi.1003829.s009.pdf]

| Algorithm  | RMSD threshold | Crystal structures | Protein models      |                         | Distorted structures |                |                |
|------------|----------------|--------------------|---------------------|-------------------------|----------------------|----------------|----------------|
|            |                |                    | <i>High-quality</i> | <i>Moderate-quality</i> | <i>2Å RMSD</i>       | <i>4Å RMSD</i> | <i>6Å RMSD</i> |
| SOIPPA     | 2Å             | 6.3%               | -                   | -                       | -                    | -              | -              |
| eMatchSite |                | 15.6%              | 11.5%               | 6.5%                    | 12.1%                | 7.3%           | 4.4%           |
| SOIPPA     | 5Å             | 23.6%              | -                   | -                       | -                    | -              | -              |
| eMatchSite |                | 60.7%              | 56.4%               | 52.4%                   | 59.5%                | 50.4%          | 40.0%          |
