# Supplementary material for: eMatchSite: Sequence Order-Independent Structure Alignments of Ligand Binding Pockets in Protein Models
Source: PubMed Central journal article supplement (PMC4168975; doi:10.1371/journal.pcbi.1003829), 2014-09-18
Supplement: pcbi.1003829.s010.pdf [file pcbi.1003829.s010.pdf]

| Algorithm  | Ligand | Crystal structures |                                   | Protein models      |                                   |                         |                                   | Distorted structures |                                   |                |                                   |                |                                   |
|------------|--------|--------------------|-----------------------------------|---------------------|-----------------------------------|-------------------------|-----------------------------------|----------------------|-----------------------------------|----------------|-----------------------------------|----------------|-----------------------------------|
|            |        |                    |                                   | <i>High-quality</i> |                                   | <i>Moderate-quality</i> |                                   | <i>2Å RMSD</i>       |                                   | <i>4Å RMSD</i> |                                   | <i>6Å RMSD</i> |                                   |
|            |        | <i>RMSD</i>        | $\Delta$ <i>RMSD</i> <sup>a</sup> | <i>RMSD</i>         | $\Delta$ <i>RMSD</i> <sup>a</sup> | <i>RMSD</i>             | $\Delta$ <i>RMSD</i> <sup>a</sup> | <i>RMSD</i>          | $\Delta$ <i>RMSD</i> <sup>a</sup> | <i>RMSD</i>    | $\Delta$ <i>RMSD</i> <sup>a</sup> | <i>RMSD</i>    | $\Delta$ <i>RMSD</i> <sup>a</sup> |
| SiteEngine | ADP    | 5.5 ±2.3           | 3.9 ±2.2                          | 6.3 ±2.2            | 4.7 ±2.1                          | 6.6 ±2.2                | 5.1 ±2.2                          | 6.2 ±2.2             | 4.6 ±2.2                          | 6.8 ±2.1       | 5.2 ±2.0                          | 8.4 ±12.8      | 6.9 ±12.8                         |
| eMatchSite |        | 5.1 ±2.4           | 3.4 ±2.3                          | 5.4 ±2.3            | 3.8 ±2.3                          | 5.3 ±2.4                | 3.8 ±2.4                          | 5.1 ±2.2             | 3.5 ±2.1                          | 6.0 ±2.3       | 4.4 ±2.2                          | 6.6 ±2.7       | 5.0 ±2.7                          |
| SiteEngine | ATP    | 6.2 ±2.3           | 3.9 ±2.2                          | 6.9 ±1.9            | 4.5 ±1.9                          | 7.2 ±2.1                | 4.8 ±2.1                          | 7.1 ±2.3             | 4.8 ±2.3                          | 7.0 ±2.2       | 4.7 ±2.1                          | 7.5 ±2.3       | 5.1 ±2.3                          |
| eMatchSite |        | 6.0 ±2.3           | 3.7 ±2.2                          | 6.0 ±2.2            | 3.6 ±2.0                          | 6.2 ±1.9                | 3.8 ±1.9                          | 5.6 ±2.0             | 3.3 ±1.9                          | 6.7 ±2.6       | 4.3 ±2.6                          | 5.8 ±1.8       | 3.4 ±1.8                          |
| SiteEngine | FAD    | 6.8 ±4.8           | 4.1 ±4.0                          | 8.3 ±4.6            | 5.6 ±4.0                          | 10.5 ±4.5               | 8.0 ±4.5                          | 7.3 ±4.4             | 4.7 ±3.8                          | 8.4 ±4.5       | 5.7 ±3.9                          | 9.5 ±4.2       | 6.7 ±3.9                          |
| eMatchSite |        | 4.5 ±2.4           | 1.8 ±1.7                          | 5.1 ±2.2            | 2.4 ±1.7                          | 5.6 ±2.4                | 3.2 ±2.0                          | 4.8 ±2.3             | 2.1 ±1.7                          | 5.8 ±2.6       | 3.1 ±2.0                          | 7.4 ±3.3       | 4.7 ±2.8                          |
| SiteEngine | NAD    | 5.7 ±3.9           | 3.3 ±3.4                          | 7.4 ±3.9            | 5.1 ±3.6                          | 8.4 ±3.7                | 6.0 ±3.6                          | 6.5 ±3.8             | 4.1 ±3.4                          | 7.6 ±3.5       | 5.3 ±3.4                          | 8.8 ±3.6       | 6.3 ±3.3                          |
| eMatchSite |        | 5.1 ±3.4           | 2.7 ±3.1                          | 5.7 ±3.6            | 3.3 ±3.3                          | 5.9 ±2.9                | 3.6 ±2.6                          | 4.8 ±3.2             | 2.5 ±2.8                          | 5.4 ±2.7       | 3.1 ±2.5                          | 2.9 ±2.4       | 3.4 ±2.1                          |
| SiteEngine | SAH    | 2.3 ±1.7           | 1.3 ±1.2                          | 4.6 ±2.9            | 3.6 ±2.8                          | 6.3 ±3.3                | 5.5 ±3.3                          | 3.5 ±2.0             | 2.5 ±1.8                          | 5.5 ±2.8       | 4.5 ±2.7                          | 6.4 ±2.7       | 5.4 ±2.8                          |
| eMatchSite |        | 2.2 ±1.1           | 1.2 ±0.7                          | 2.7 ±1.4            | 1.7 ±1.2                          | 3.3 ±1.2                | 2.4 ±1.2                          | 2.6 ±0.9             | 1.6 ±0.7                          | 3.3 ±1.5       | 2.3 ±1.4                          | 4.7 ±2.1       | 3.7 ±2.1                          |
| SiteEngine | SAM    | 3.9 ±3.0           | 2.3 ±2.3                          | 5.3 ±3.2            | 3.8 ±3.0                          | 7.4 ±2.7                | 6.0 ±2.6                          | 3.8 ±2.7             | 2.4 ±2.0                          | 5.1 ±2.4       | 3.7 ±2.0                          | 5.7 ±2.8       | 4.4 ±2.5                          |
| eMatchSite |        | 5.0 ±3.4           | 3.4 ±3.1                          | 3.0 ±2.1            | 1.6 ±1.1                          | 4.1 ±2.0                | 2.7 ±1.5                          | 3.2 ±2.1             | 1.8 ±1.3                          | 3.8 ±1.8       | 2.4 ±1.3                          | 4.2 ±2.6       | 2.9 ±2.0                          |
| SiteEngine | All    | 5.6 ±3.4           | 3.7 ±2.9                          | 6.8 ±3.3            | 4.8 ±2.9                          | 7.9 ±3.7                | 6.0 ±3.5                          | 6.4 ±3.2             | 4.4 ±2.8                          | 7.2 ±3.1       | 5.2 ±2.8                          | 8.5 ±8.6       | 6.5 ±8.5                          |
| eMatchSite |        | 4.8 ±2.6           | 2.8 ±2.4                          | 5.2 ±2.6            | 3.3 ±2.3                          | 5.3 ±2.5                | 3.4 ±2.2                          | 4.8 ±2.4             | 2.9 ±2.2                          | 5.7 ±2.5       | 3.8 ±2.3                          | 6.5 ±2.9       | 4.4 ±2.6                          |

<sup>a</sup>  $\Delta$ *RMSD* is calculated by subtracting from *RMSD* a ligand heavy-atom root-mean-square deviation upon the superposition of two ligands.
